# Supplementary material for: SH3GLB2/endophilin B2 regulates lung homeostasis and recovery from severe influenza A virus infection
Source: Sci Rep. 2017 Aug 4;7:7262. doi: 10.1038/s41598-017-07724-5 (PMC5544693; doi:10.1038/s41598-017-07724-5)
Supplement: Supplementary file 1 — Supplementary Figures [file 41598_2017_7724_MOESM1_ESM.pdf]

## **SUPPLEMENTARY FIGURES**

Title:

SH3GLB2/endophilin B2 regulates lung homeostasis and recovery from severe influenza A virus infection

List of Authors:

Kristin K Fino, Linlin Yang, Patricia Silveyra, Sanmei Hu, Todd M. Umstead, Susan Diangelo, E. Scott Halstead, Timothy K Cooper, Thomas Abraham, Yoshinori Takahashi, Zhixiang Zhou, Hong Gang Wang, and Zissis C. Chroneos

S1A

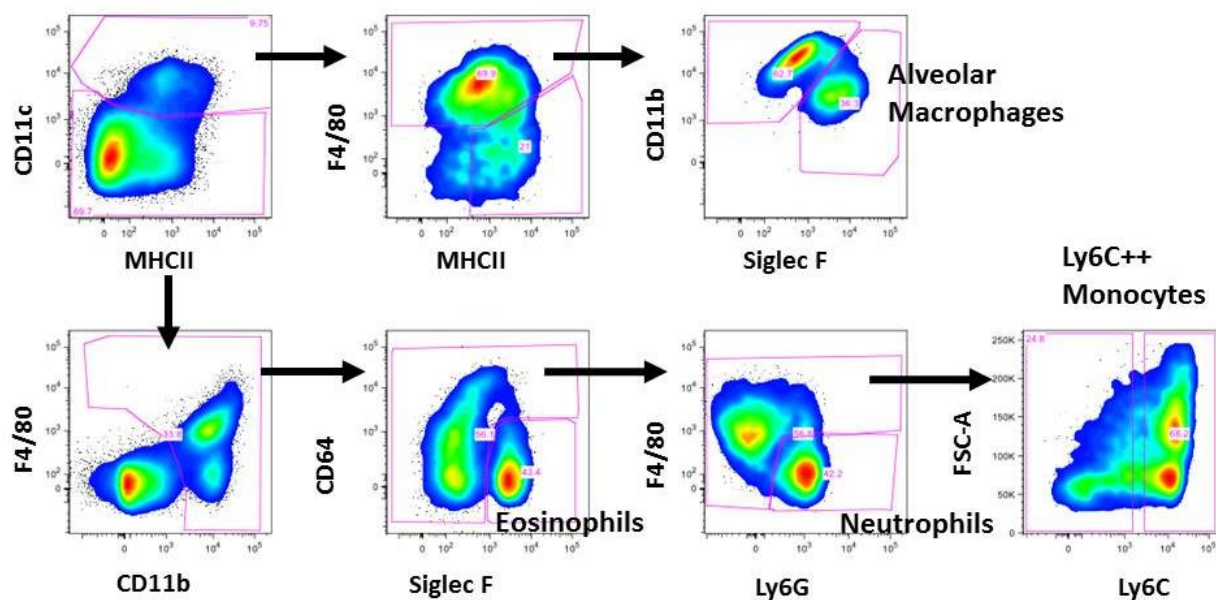

S1B

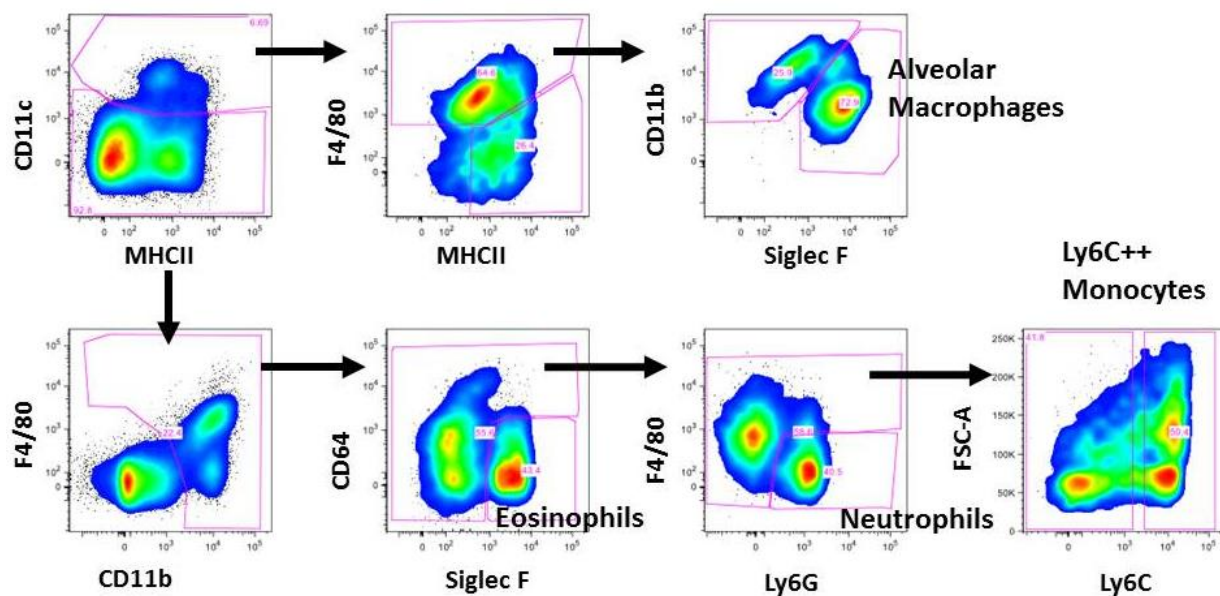

**Supplementary Figure S1:** Flow cytometry gating strategy. Representative flow cytometry profiling for lung cells obtained on day 12 after infection of WT (S1A) and B2-/- (S1B) mice.

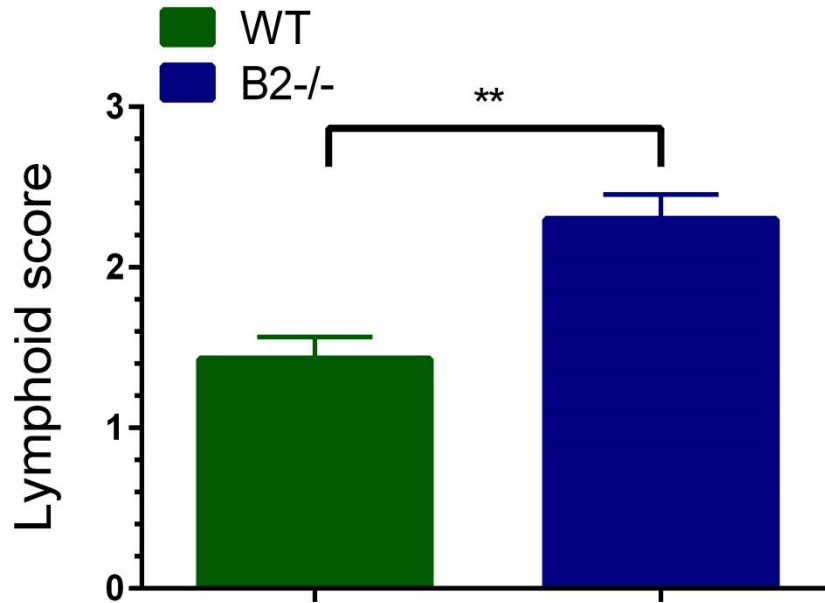

**Supplementary Figure S2: Peribronchiolar lymphoid cuffing sores.** Lung tissues sections from WT and B2-/- mice stained with H&E were scored for peribronchiolar lymphocytic cuffing as described in “Materials and Methods”. Data shown are means±SEM from tissue section of n=7 WT mice and n=5 B2-/- mice. \*\*p<0.0004.

S3A

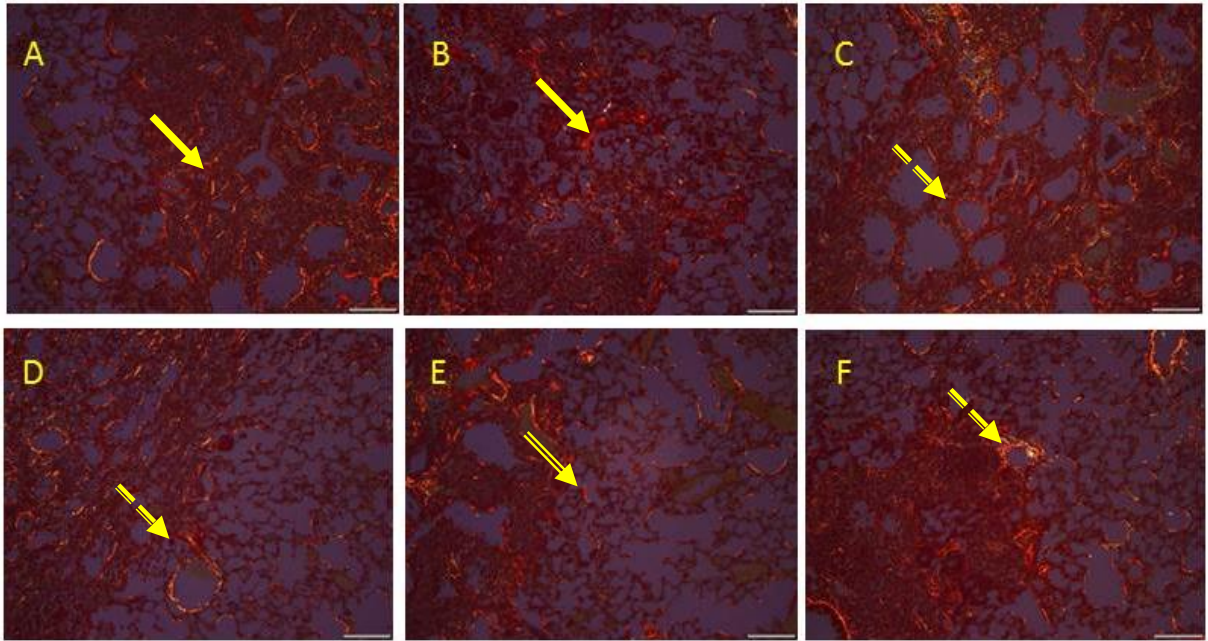

S3B

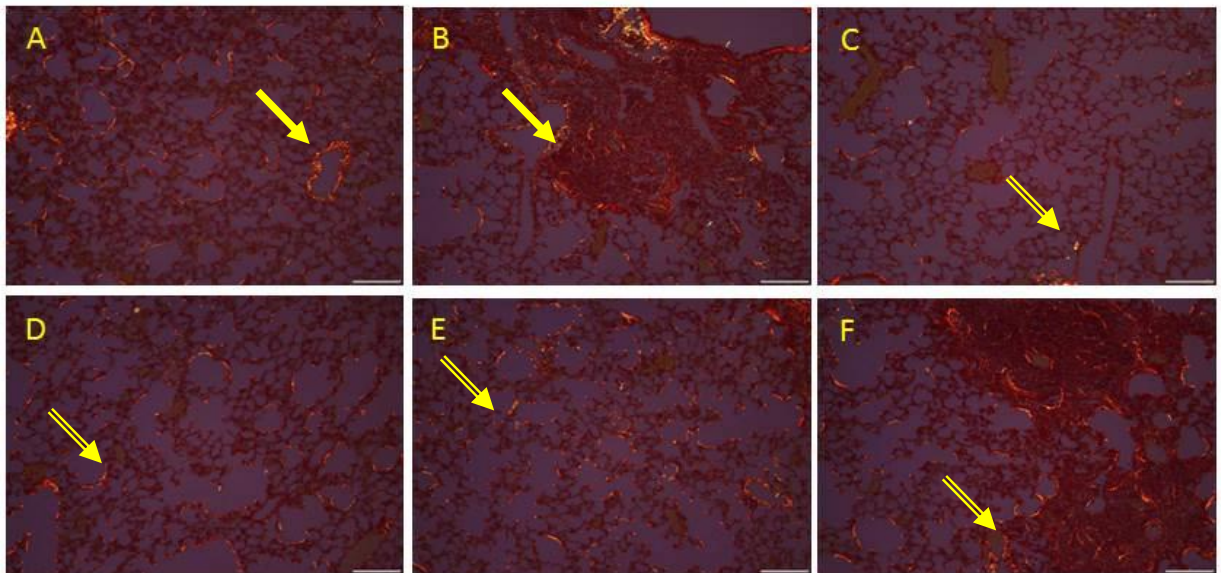

**Supplementary Figure S3:** Representative picric acid stained lung tissue sections from day 12 IAV infected lungs from WT (S2A) and B2-/- (S2B) mice. Picrosirius red stained sections visualized by optical birefringence microscopy were used for quantitative analysis of collagen birefringence light intensity derived from alveolar (lined arrows), bronchiolar/vascular (broken lined arrows), and in intralveolar lesions (solid arrows) as described in “Materials and Methods”.

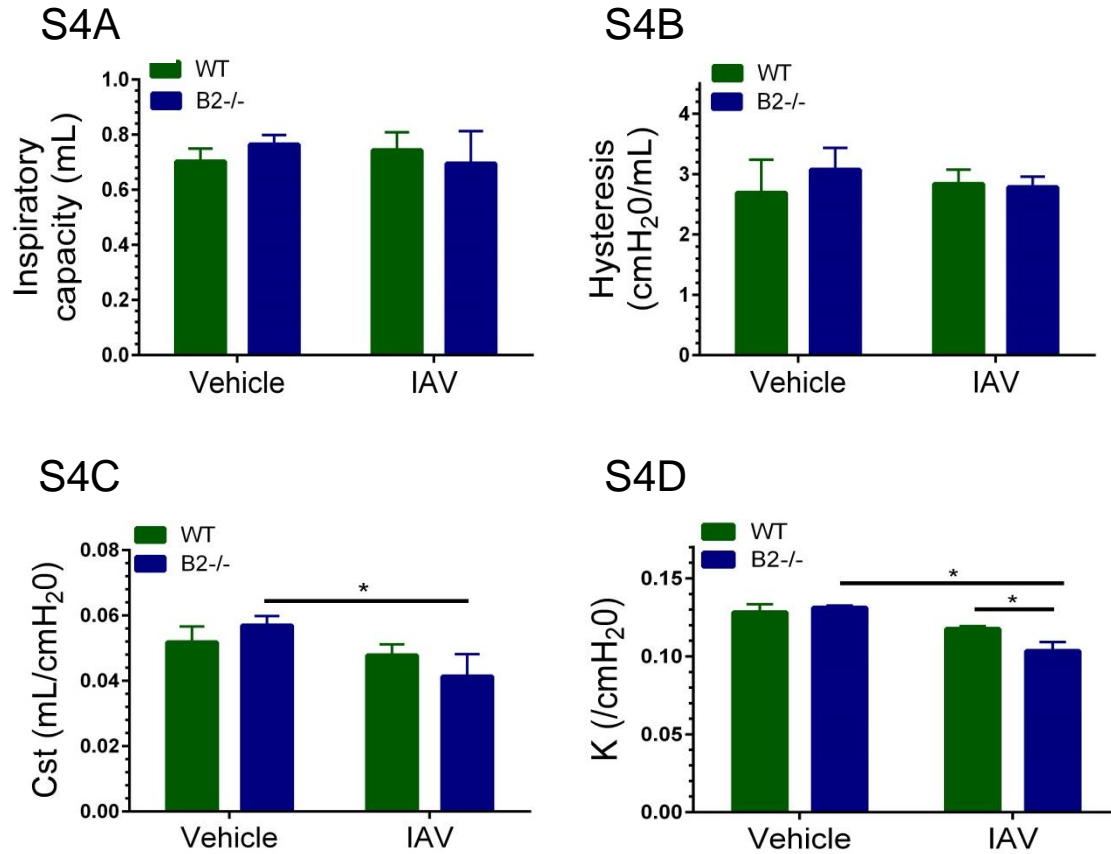

**Supplementary Figure S4.** Respiratory mechanical measurements in WT and B2<sup>-/-</sup> mice before and after IAV infection. The inspiratory capacity (S3A), hysteresis (S3B), quasi-static compliance (S3C), and curvature parameter (S3D) were calculated by fitting the Salazar-Knowles equation to the expiratory branch pressure-volume curves generated using a FlexiVent ventilator<sup>1</sup> as described in “Materials and Methods” in WT and B2<sup>-/-</sup> mice 14 days after administration of vehicle or IAV. Data shown are means±SD, n=4 mice per group. In S3C, \*p<0.022 between vehicle and IAV treatment in B2<sup>-/-</sup> mice. In S3D, \*p<0.027 between WT and B2<sup>-/-</sup> treatment groups, and \*p<0.0011 between vehicle and IAV treatment in WT.

S5A

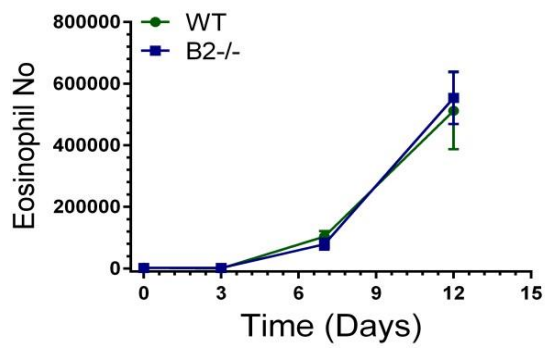

S5B

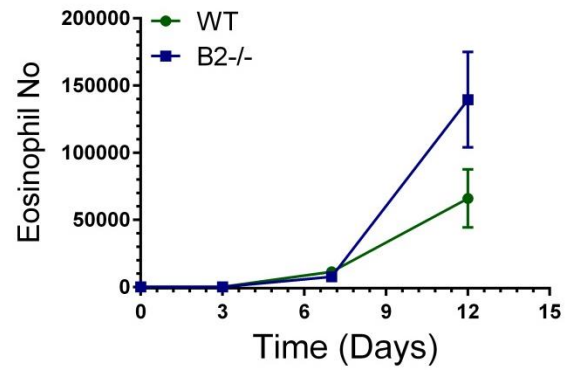

**Supplementary Figure S5.** Similar eosinophil recruitment was measured in response to IAV infection in WT and B2 mice. (S2A) Number of eosinophils in lungs. (S2B) Number of eosinophils in BAL.

- 1 McGovern, T. K., Robichaud, A., Fereydoonzad, L., Schuessler, T. F. & Martin, J. G. Evaluation of respiratory system mechanics in mice using the forced oscillation technique. *Journal of visualized experiments : JoVE*, e50172, doi:10.3791/50172 (2013).

## **SUPPLEMENTARY WESTERN BLOT IMAGES**

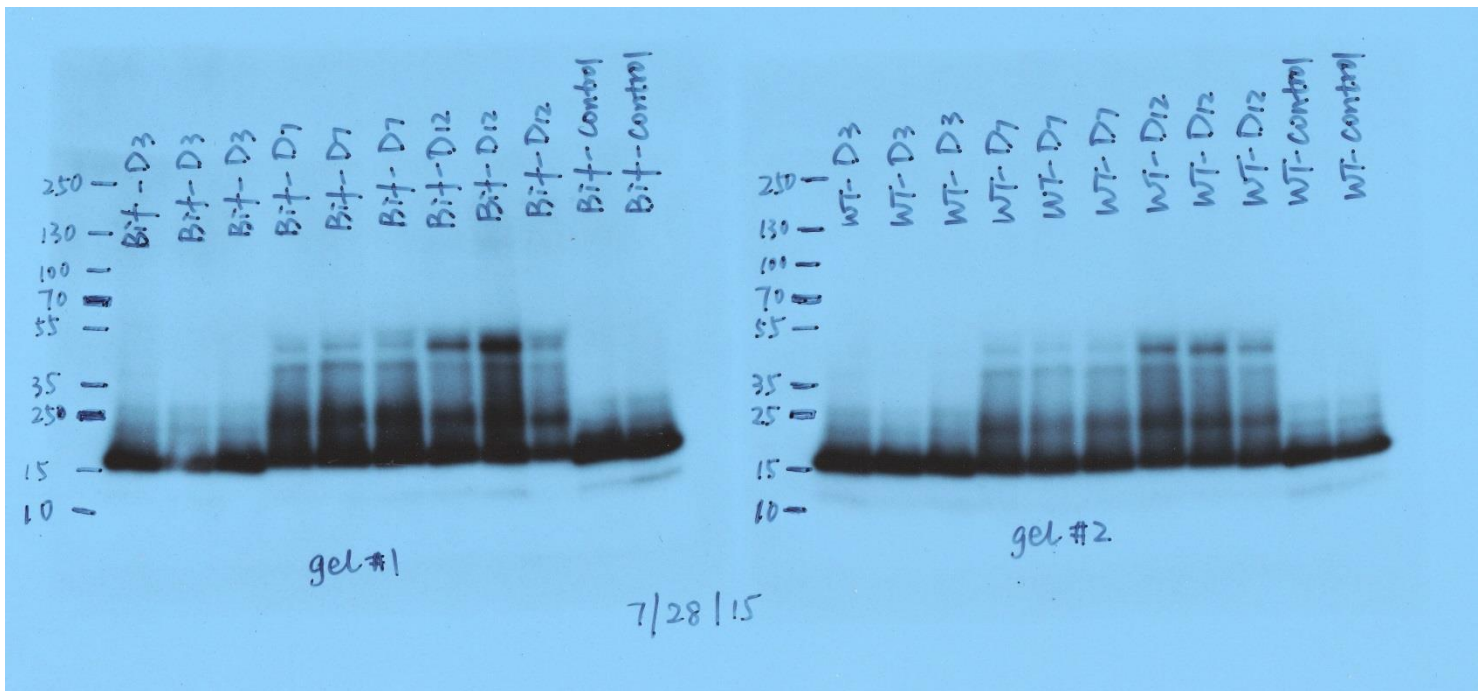

Non-reducing gel probed with anti-SP-B antibody

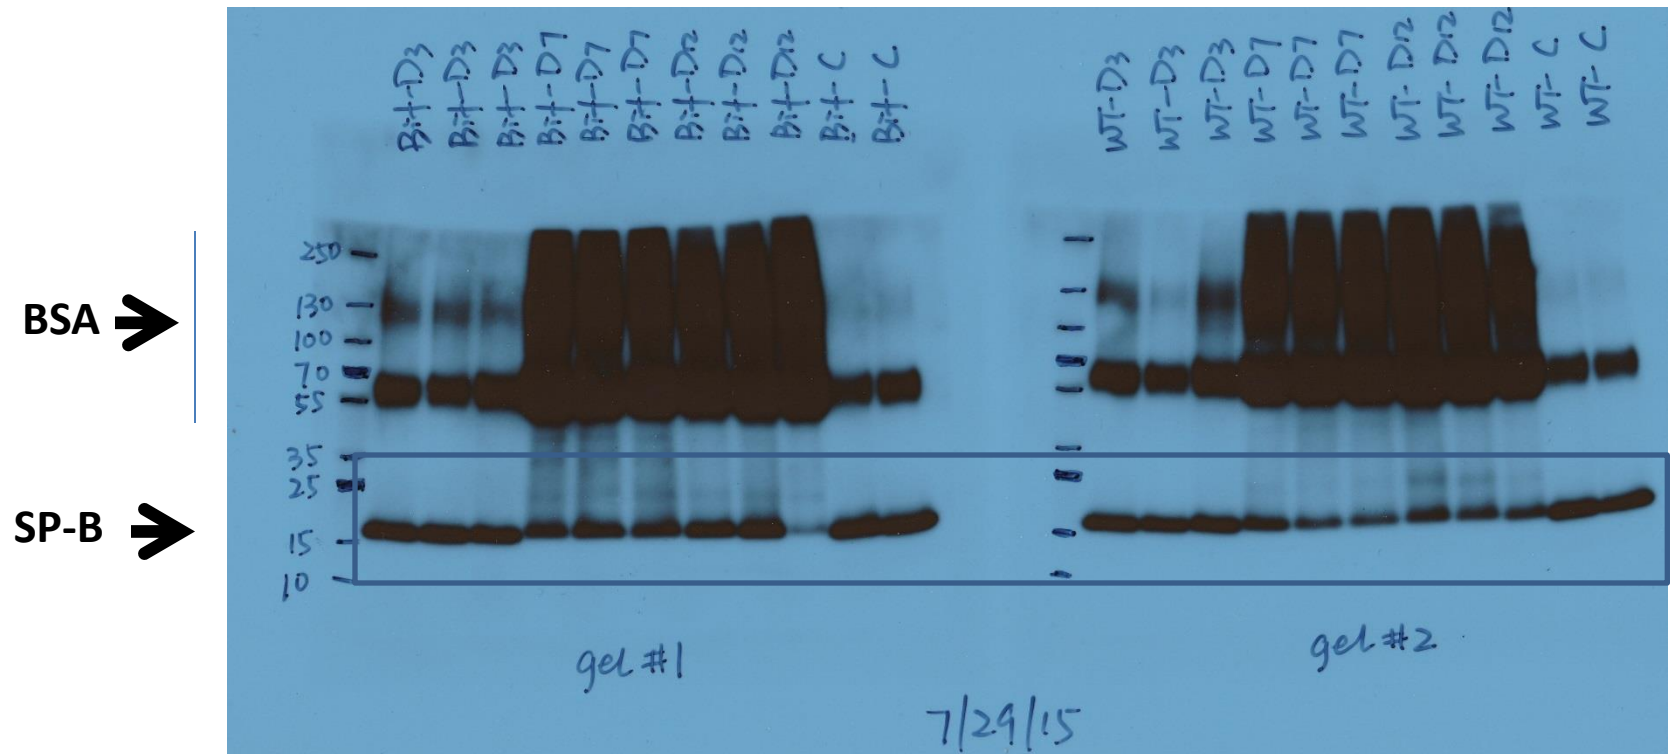

Non-reducing gel probed sequentially with anti-SP-B and anti BSA anti-bodies  
The blots shown in Figure 3A were cropped from this blot in the boxed enclosure

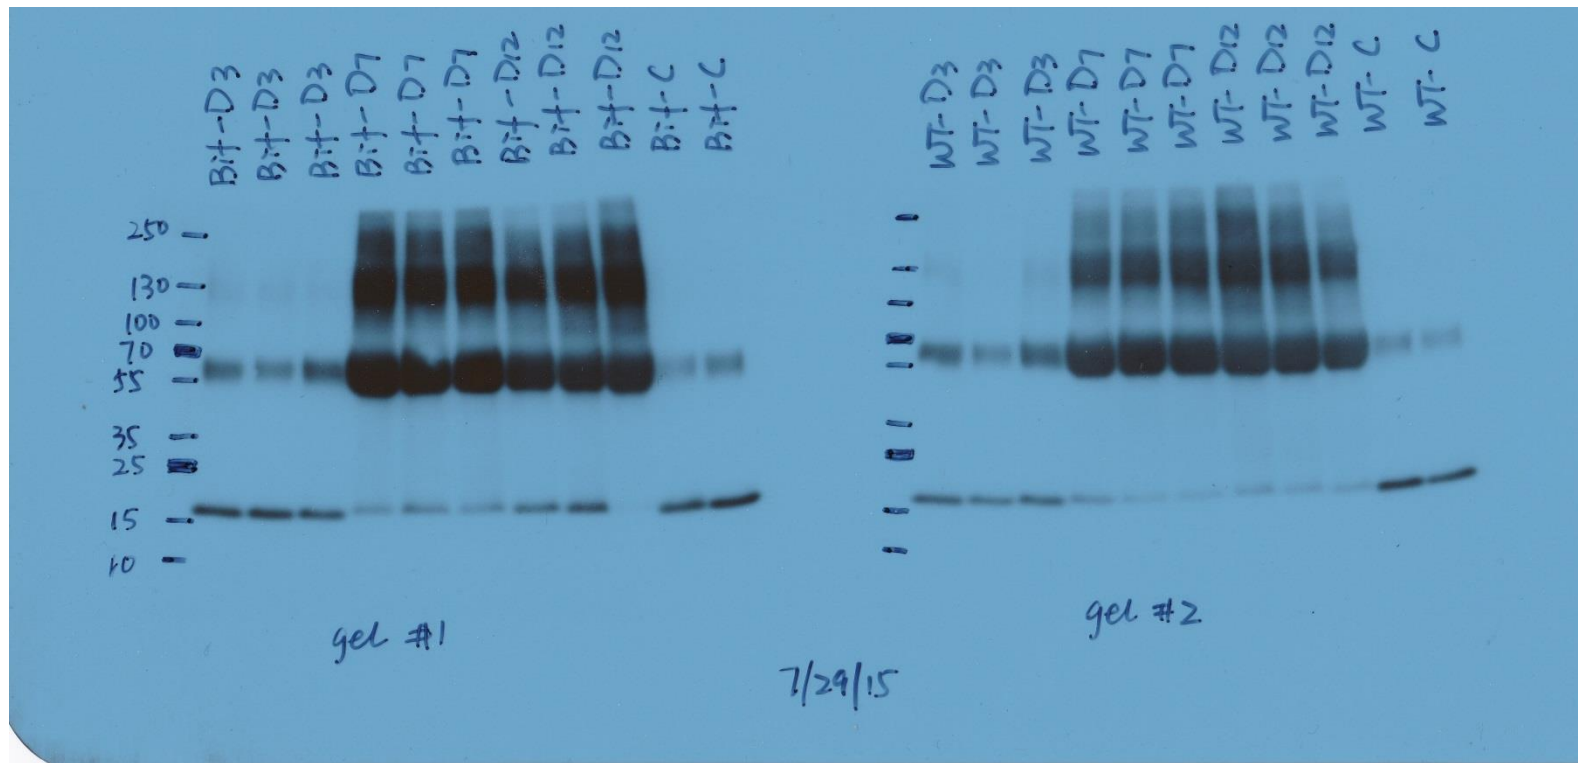

A shorter exposure of the above non-reducing gel probed sequentially with anti-SP-B and anti BSA anti-bodies

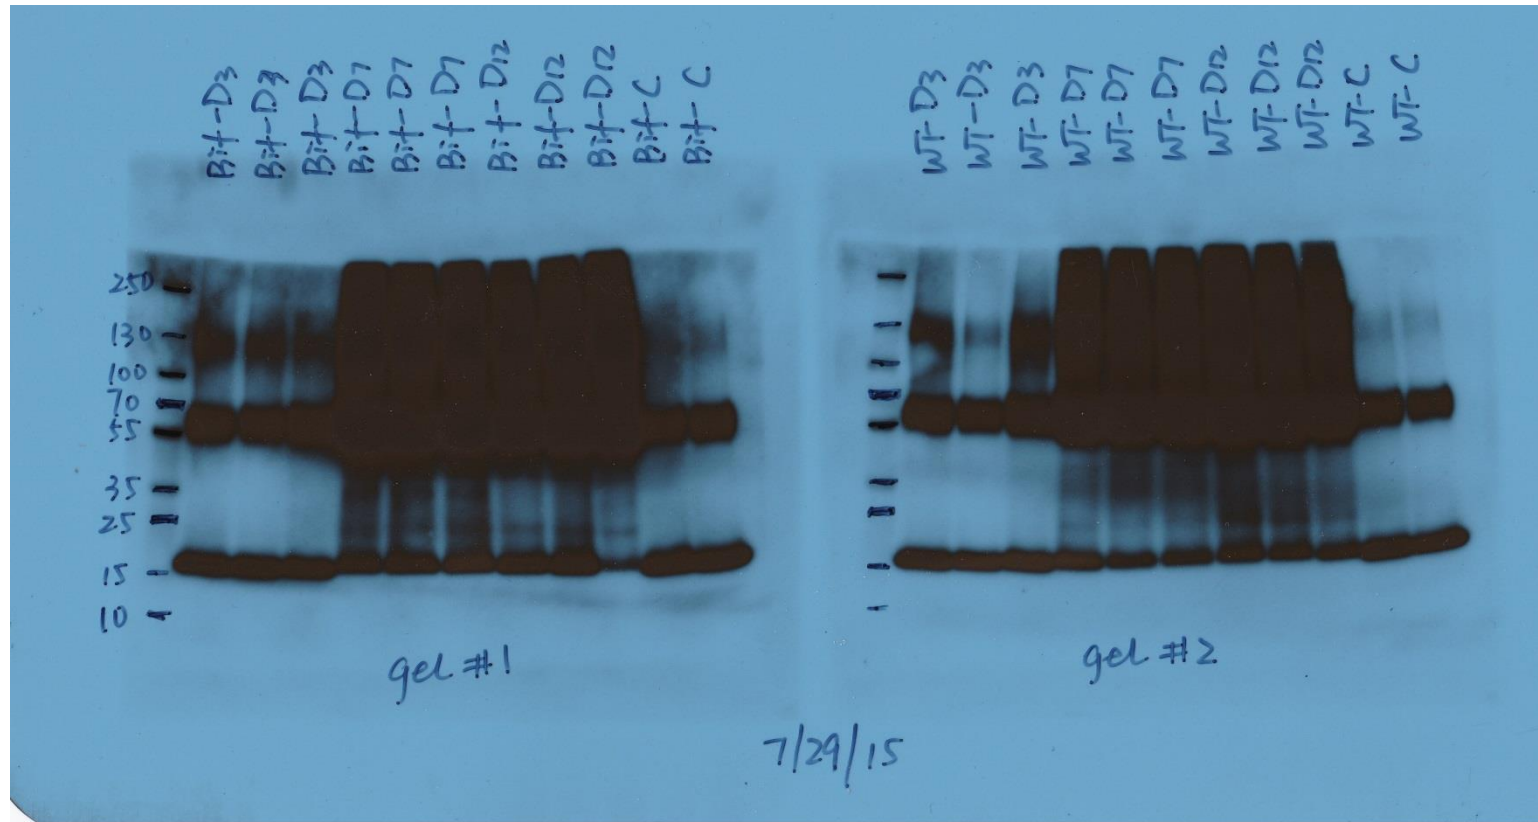

A longer exposure of the above non-reducing gel probed sequentially with anti-SP-B and anti BSA anti-bodies
